# Supplementary material for: Adsorption of Respiratory Syncytial Virus, Rhinovirus, SARS-CoV-2, and F+ Bacteriophage MS2 RNA onto Wastewater Solids from Raw Wastewater
Source: PubMed Central journal article supplement — Environ Sci Technol. 2023 Aug 30;57(36):13346–55. doi: 10.1021/acs.est.3c03376 (PMC10501194; doi:10.1021/acs.est.3c03376), 2023-08-30
Supplement: es3c03376_si_001.pdf [file es3c03376_si_001.pdf]

## Supporting Information for

### **Adsorption of Respiratory Syncytial Virus (RSV), Rhinovirus, SARS-CoV-2, and F+ bacteriophage MS2 RNA onto wastewater solids from raw wastewater**

Laura Roldan-Hernandez<sup>1</sup> and Alexandria B. Boehm<sup>1\*</sup>

1. Department of Civil & Environmental Engineering, School of Engineering and Doerr School of Sustainability, Stanford University, 473 Via Ortega, Stanford, CA, USA 94305

\* Author to whom correspondence should be addressed. Email: [aboehm@stanford.edu](mailto:aboehm@stanford.edu), Tel: 650-724-9128

**Number of pages: 10**

**Number of Tables: 5**

**Number of Figures: 5**

## Linear and Langmuir models

The Linear and Langmuir isotherm equations are defined as

$$\text{Linear:} \quad K_d = q_e/C_e \quad (1)$$

$$\text{Langmuir:} \quad q_e = \frac{q_{\max}K_L C_e}{1 + K_L C_e} \quad (2)$$

where  $q_e$  is the equilibrium concentration of viral genomes in solids (cp/g),  $C_e$  is the equilibrium concentration of viral genomes in the liquid fraction of wastewater,  $q_{\max}$  is the maximum adsorption capacity (cp/g),  $K_L$  is the Langmuir constant, and  $K_d$  is the distribution coefficient.

### Additional details related to EMMI<sup>1</sup> guidelines

The average number of droplets per two merged wells was 40,476 (standard deviation = 3,184). The machine vendor reports the droplet size as 0.00085  $\mu\text{L}$ . Average number of copies per partition ( $\lambda$ ) (standard deviation) for SARS-CoV-2 N gene was 0.027 (0.0008) and for BCoV was 0.238 (0.004).  $\lambda$  for other human viruses was similar to SARS-CoV-2.

**Table S1: Primers and probes for RT-ddPCR assays**

| Target                       | Sequence                                                                                                                                                           | Reference |
|------------------------------|--------------------------------------------------------------------------------------------------------------------------------------------------------------------|-----------|
| SARS-CoV-2<br>(N gene)       | Forward primer: 5'-CATTACGTTTGGTGGACCCT-3'<br>Reverse primer: 5'-CCTTGCCATGTTGAGTGAGA-3'<br>Probe: CGCGATCAAAACAACGTCGG (5' FAM/ZEN/3' IBFQ)                       | 2         |
| RSV<br>(N gene)              | Forward primer: 5'- CTCCAGAATAYAGGCATGAYTCTCC-3'<br>Reverse primer: 5'- GCYCTYCTAATYACWGCTGTAAGAC-3'<br>Probe: TAACCAAATTAGCAGCAGGAGATAGATCAG (5' HEX/ZEN/3' IBFQ) | 3         |
| RV                           | Forward primer: 5'-GCCYGCGTGGCKGCC-3'<br>Reverse primer: 5'-GAAACACGGACACCCAAAG-3'<br>Probe: TCCTCCGGCCCCCTGAATG (5' FAM/ZEN/3' IBFQ)                              | 3         |
| MS2                          | Forward: 5'-GTCCATACCTTAGATGCGTTAGC-3'<br>Reverse: 5'-CCGTTAGCGAAGTTGCTTGG-3'<br>Probe: ACGTCGCCAGTTCGCCATTGTCTG (5' FAM/ZEN/3' IBFQ)                              | 4,5       |
| BCoV<br>(Extraction control) | Forward primer: 5'-CTGGAAGTTGGTGGAGTT-3'<br>Reverse primer: 5'-ATTATCGGCCTAACATACATC-3'<br>Probe: CCTTCATATCTATACACATCAAGTTGTT (5' FAM/ZEN/3' IBFQ)                | 6         |

All probes contained fluorescent molecules and quenchers (5' FAM and or HEX/ZEN/3' IBFQ); FAM, 6-fluorescein amidite; HEX, hexachloro-fluorescein; ZEN, a proprietary internal quencher from Integrated DNA Technologies (Coralville, IA, USA); and IBFQ, Iowa Black FQ.

**Table S2: Thermal cycling conditions for SARS-CoV-2, RSV, RV, MS2, and BCoV**

| Cycling Step          | Temperature °C                                          | Time     | Number of Cycles |
|-----------------------|---------------------------------------------------------|----------|------------------|
| Reverse transcription | 50                                                      | 60 min   | 1                |
| Enzyme activation     | 95                                                      | 10 min   | 1                |
| Denaturation          | 95                                                      | 30 sec   | 40               |
| Annealing/extension   | SARS-CoV-2 and RSV: 59<br>RV: 61<br>MS2: 60<br>BCoV: 56 | 1 min*   | 40               |
| Enzyme deactivation   | 98                                                      | 10 min   | 1                |
| Hold                  | 4                                                       | Infinite | 1                |

\*Ramp rate set to 2°C/sec

**Table S3: Served population and annual average daily flow (MGD) of wastewater treatment plants**

| Plant                                                      | Location      | Approximate number of people served in the sewershed <sup>†</sup> | Annual Average daily flow (MGD) | Min and Max TSS reported in 2022 (mg/L) | Min and Max pH reported in 2022 [-] |
|------------------------------------------------------------|---------------|-------------------------------------------------------------------|---------------------------------|-----------------------------------------|-------------------------------------|
| Oceanside Water Pollution Control Plant (OS)               | San Francisco | 250,000                                                           | 21.7                            | 33–1,630                                | *                                   |
| Southeast Water Pollution Control Plant (SE)               | San Francisco | 580,000                                                           | 56.9                            | 26–727                                  | 7.0–7.9                             |
| Silicon Valley Clean Water Wastewater Treatment Plant (SV) | Redwood City  | 199,000                                                           | 12.4                            | 160–400                                 | 7.0–7.6                             |
| Sunnyvale Water Pollution Control Plant (SU)               | Sunnyvale     | 161,021                                                           | 12.6                            | 164–376                                 | 6.4–7.2                             |
| San Jose-Santa Clara Regional Wastewater Facility (SJ)     | San Jose      | 1,419,393                                                         | 90.7                            | 250–400                                 | 7.5–7.9                             |
| South County Regional Wastewater Treatment Plant (GI)      | Gilroy        | 105,394                                                           | 8.5                             | 152–552                                 | 6.5–7.3                             |

Notes:

<sup>†</sup> Based on the most recent National Pollution Discharge Elimination System (NPDES) permit and U.S. Census Bureau, 2020 American Community Survey block data

\* Wastewater treatment plant does not measure pH in raw influent

**Table S4: Langmuir and Linear isotherm parameters for SARS-CoV-2, RSV-A, RV-B, and MS2 into wastewater solids and their respective average relative error (ARE).**

| Virus      | Temp. (°C) | Langmuir model              |                                 |      | Linear model                |      |
|------------|------------|-----------------------------|---------------------------------|------|-----------------------------|------|
|            |            | $K_L$ (g·ml <sup>-1</sup> ) | $q_{max}$ (cp·g <sup>-1</sup> ) | ARE  | $K_d$ (g·ml <sup>-1</sup> ) | ARE  |
| SARS-CoV-2 | 4          | $4.5 \times 10^{-4}$        | $2.6 \times 10^7$               | 0.52 | 7,460                       | 0.45 |
|            | 22         | $1.0 \times 10^{-3}$        | $9.5 \times 10^7$               | 0.94 | 46,044                      | 3.83 |
| RSV-A      | 4          | $6.2 \times 10^{-4}$        | $2.6 \times 10^8$               | 3.72 | 136,809                     | 2.97 |
|            | 22         | $2.6 \times 10^{-3}$        | $2.5 \times 10^8$               | 3.76 | 425,372                     | 4.49 |
| RV-B       | 4          | $3.3 \times 10^{-4}$        | $2.3 \times 10^7$               | 0.15 | 3,396                       | 0.41 |
|            | 22         | $4.0 \times 10^{-6}$        | $1.6 \times 10^7$               | 0.73 | 1,583                       | 0.99 |
| MS2        | 4          | $4.1 \times 10^{-5}$        | $6.1 \times 10^7$               | 0.65 | 1,260                       | 0.42 |
|            | 22         | $3.3 \times 10^{-5}$        | $1.1 \times 10^7$               | 0.68 | 148                         | 0.93 |

**Table S5: Background concentration of endogenous of SARS-CoV-2, RSV, RV, and F+ coliphage/MS2 in wastewater influent samples stored at 4°C and 22°C**

| Virus                        | 4°C experiment                   |                                | 22°C experiment                  |                                |
|------------------------------|----------------------------------|--------------------------------|----------------------------------|--------------------------------|
|                              | Conc. in liquid fraction (cp/ml) | Conc. in solid fraction (cp/g) | Conc. in liquid fraction (cp/ml) | Conc. in solid fraction (cp/g) |
| <b>SARS-CoV-2</b>            | 0.50                             | 13,451                         | 0.33                             | 93,752                         |
| <b>RSV</b>                   | 0.67                             | 4,208                          | 0.97                             | 22,190                         |
| <b>RV</b>                    | 0.88                             | 90,729                         | 0.87                             | 22,580                         |
| <b>F+ coliphage/<br/>MS2</b> | 0.22                             | 28,731                         | 0.25                             | 4,121                          |

# Environmental Microbiology Minimum Information Checklist

## Study Description

Study: SCAN  
Date: March 2023  
Completed by: Alexandria Boehm

Environmental Sampling

Described in methods section

Sample Treatment

Performed  
 No sample treatment performed

Sample Reduction

Performed  
Centrifugation was used, as described in the methods

Nucleic Acid Extraction

Methods provided in the paper.

Reverse Transcription

Performed  
One Step RT-PCR

PCR Detection

qPCR  dPCR  
All methods provided

Analysis

Provided in methods

---

## Control Checklist

|                         | Environmental Sampling              | Sample Treatment         | Sample Reduction                    | Nucleic Acid Extraction             | Reverse Transcription               | PCR Detection                       |                          |
|-------------------------|-------------------------------------|--------------------------|-------------------------------------|-------------------------------------|-------------------------------------|-------------------------------------|--------------------------|
| Step performed          | <input checked="" type="checkbox"/> | <input type="checkbox"/> | <input checked="" type="checkbox"/> | <input checked="" type="checkbox"/> | <input checked="" type="checkbox"/> | <input checked="" type="checkbox"/> |                          |
| Step has control info   | <input type="checkbox"/>            | <input type="checkbox"/> | <input type="checkbox"/>            | <input checked="" type="checkbox"/> | <input checked="" type="checkbox"/> | <input checked="" type="checkbox"/> | <b>Negative Controls</b> |
| # control replicates    |                                     |                          |                                     | 5                                   | 3                                   | 3                                   |                          |
| Control result reported | <input type="checkbox"/>            | <input type="checkbox"/> | <input type="checkbox"/>            | <input checked="" type="checkbox"/> | <input checked="" type="checkbox"/> | <input checked="" type="checkbox"/> |                          |
| Data handling reported  | <input checked="" type="checkbox"/> | <input type="checkbox"/> | <input checked="" type="checkbox"/> | <input checked="" type="checkbox"/> | <input checked="" type="checkbox"/> | <input checked="" type="checkbox"/> |                          |
| Control introduced      | <input type="checkbox"/>            | <input type="checkbox"/> | <input checked="" type="checkbox"/> | <input type="checkbox"/>            | <input type="checkbox"/>            | <input type="checkbox"/>            | <b>Positive Controls</b> |
| Internal/External       | N/A                                 | N/A                      | Internal                            | External                            | External                            | External                            |                          |
| Independent/Parallel    | N/A                                 | N/A                      | Parallel                            | Independent                         | Independent                         | Independent                         |                          |
| Step has control info   | <input type="checkbox"/>            | <input type="checkbox"/> | <input checked="" type="checkbox"/> | <input checked="" type="checkbox"/> | <input checked="" type="checkbox"/> | <input checked="" type="checkbox"/> |                          |
| # control replicates    |                                     |                          |                                     | 5                                   | 3                                   | 3                                   |                          |
| Control result reported | <input type="checkbox"/>            | <input type="checkbox"/> | <input checked="" type="checkbox"/> | <input checked="" type="checkbox"/> | <input checked="" type="checkbox"/> | <input checked="" type="checkbox"/> |                          |
| Data Handling reported  | <input type="checkbox"/>            | <input type="checkbox"/> | <input checked="" type="checkbox"/> | <input checked="" type="checkbox"/> | <input checked="" type="checkbox"/> | <input checked="" type="checkbox"/> |                          |

---

## Process Checklist

**Environmental Sampling**

- Sampling Procedure
- Number of samples
- Sample amount, mean, range
- Sampling locations, dates, times

**Sample Reduction**

- Performed
- Reduction procedure
- Reagents
- Concentration Factor

**Nucleic Acid Extraction**

- Extraction procedure
- Amount extracted, amount obtained
- Extract storage conditions

**qPCR or dPCR**

- Target gene name, amplicon length
- Thermocycling temperatures and times
- Master mix: composition, vendors, concentrations
- Additives: vendors, concentrations
- Template amount added, pre-treatment (if any)
- Primers: sequences, concentrations, vendors, references
- Amplicon confirmation method (probe, melt curve, etc)
- Probe sequence, concentration, vendor, reference
- Instrumentation
- Equivalent volume of sample analyzed by PCR
- Inhibition assessment procedure
- Inhibition control description (if used)
- Number samples tested and found inhibited

**Reverse Transcription**

- Performed
- One or two step
- cDNA storage conditions (if two step)
- Reaction temperatures and times
- Reaction reagents and concentrations
- Priming method
- Reaction volume, added template amount
- Inhibition assessment procedure
- Inhibition control description (if used)
- Number samples tested and found inhibited

**Analysis – dPCR**

- Threshold settings
- Technical replicates, number, well merging
- Partitions measured, number, mean, variance
- Partition volume
- Target copies per partition, mean, variance
- Program used for dPCR analysis
- Explanation of control results, example plots

**Analysis – qPCR**

- Method for handling failed negative controls
- Technical replicates, number, calculations
- Calibration standards: description and source
- Method of quantifying standards
- Calibration curve slope
- Calibration curve R2
- Lowest standard measured or 95% LOD
- Cq value determination method

Figure S1. EMMI<sup>1</sup> checklist for reporting.

S7

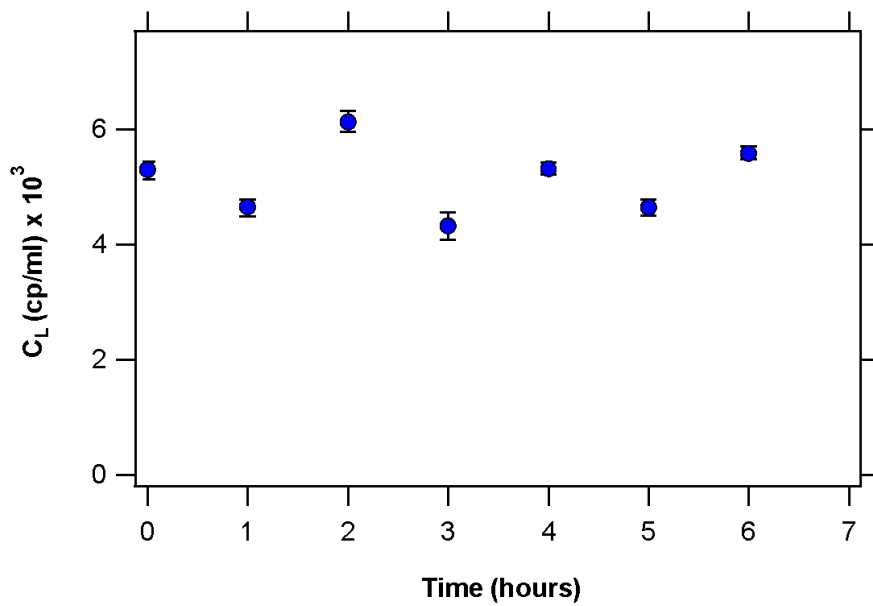

Figure S2: MS2 RNA concentration in liquid fraction at  $t=0,1,2,3,4,5,$  and 6 hours. Error bars represent the 68% confidence interval from the ddPCR. Background concentration: ND

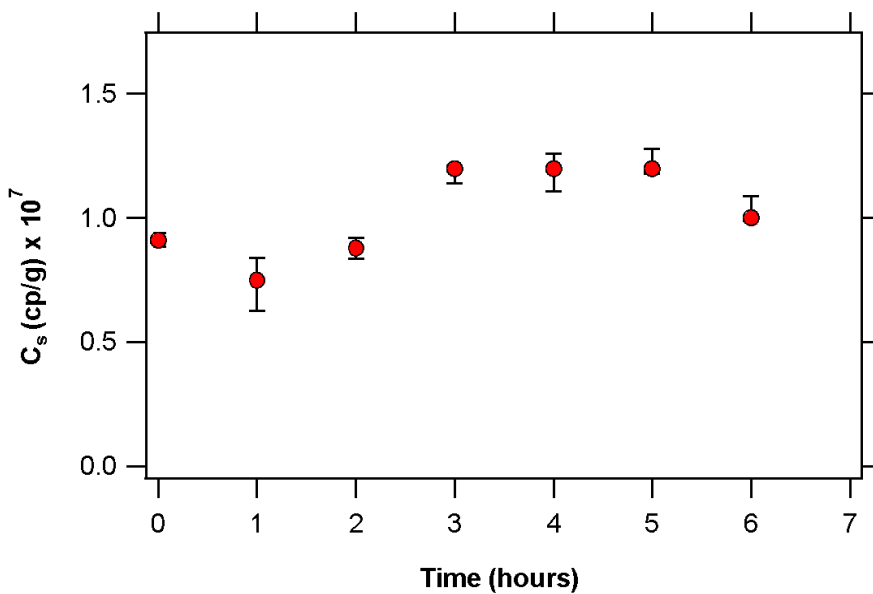

Figure S3: MS2 RNA concentration in solid fraction at  $t=0,1,2,3,4,5,$  and 6 hours. Error bars represent the 68% confidence interval from the ddPCR. Background concentration  $\sim 3.6 \times 10^4$  gc/g dry.



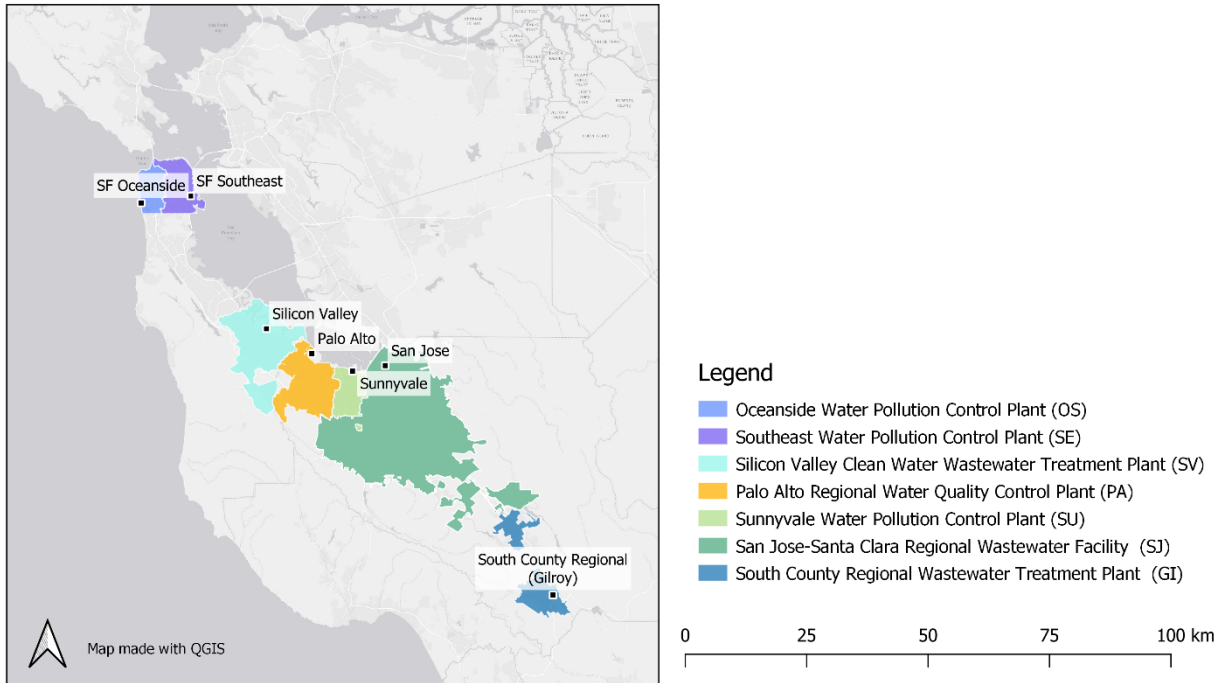

**Figure S4: Outline of wastewater treatment plant service area (sewersheds)**

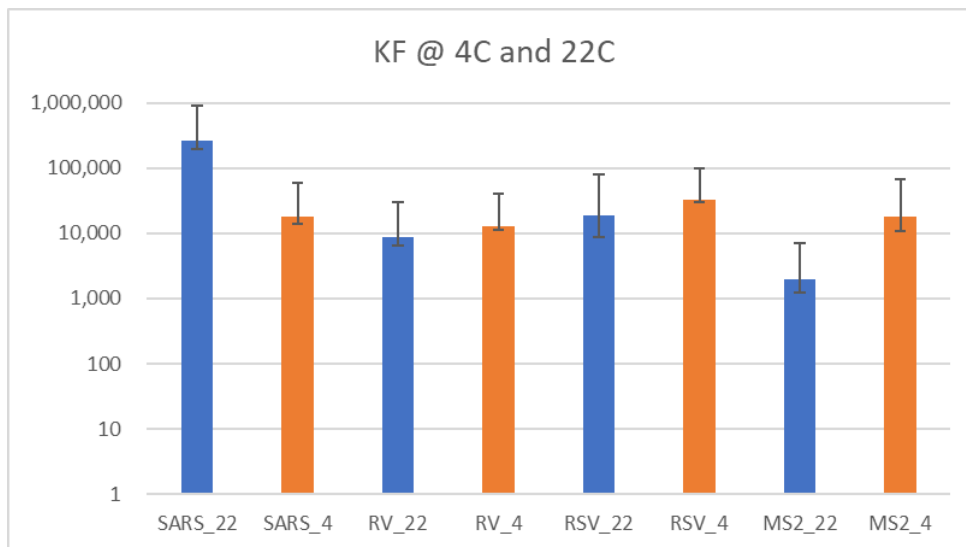

**Figure S5: Partition coefficient ( $K_F$ ) for SARS-CoV-2, RV, RV, and MS2 in wastewater influent samples stored at 4°C and 22°C. Standard errors (SE) were obtained from the linear regression of the Freundlich model in R (summary function).**

## References

- (1) Borchartd, M. A.; Boehm, A. B.; Salit, M.; Spencer, S. K.; Wigginton, K. R.; Noble, R. T. The Environmental Microbiology Minimum Information (EMMI) Guidelines: QPCR and DPCR Quality and Reporting for Environmental Microbiology. *Environ. Sci. Technol.* **2021**, acs.est.1c01767. <https://doi.org/10.1021/acs.est.1c01767>.
- (2) Wolfe, M. K.; Topol, A.; Knudson, A.; Simpson, A.; White, B.; Vugia, D. J.; Yu, A. T.; Li, L.; Balliet, M.; Stoddard, P.; Han, G. S.; Wigginton, K. R.; Boehm, A. B. High-Frequency, High-Throughput Quantification of SARS-CoV-2 RNA in Wastewater Settled Solids at Eight Publicly Owned Treatment Works in Northern California Shows Strong Association with COVID-19 Incidence. *mSystems* **2021**, *6* (5), e00829-21. <https://doi.org/10.1128/mSystems.00829-21>.
- (3) Boehm, A. B.; Hughes, B.; Duong, D.; Chan-Herur, V.; Buchman, A.; Wolfe, M. K.; White, B. J. Wastewater Concentrations of Human Influenza, Metapneumovirus, Parainfluenza, Respiratory Syncytial Virus, Rhinovirus, and Seasonal Coronavirus Nucleic-Acids during the COVID-19 Pandemic: A Surveillance Study. *The Lancet Microbe* **2023**, S266652472200386X. [https://doi.org/10.1016/S2666-5247\(22\)00386-X](https://doi.org/10.1016/S2666-5247(22)00386-X).
- (4) Gendron, L.; Verreault, D.; Veillette, M.; Moineau, S.; Duchaine, C. Evaluation of Filters for the Sampling and Quantification of RNA Phage Aerosols. *Aerosol Science and Technology* **2010**, *44* (10), 893–901. <https://doi.org/10.1080/02786826.2010.501351>.
- (5) Turgeon, N.; Toulouse, M.-J.; Martel, B.; Moineau, S.; Duchaine, C. Comparison of Five Bacteriophages as Models for Viral Aerosol Studies. *Appl Environ Microbiol* **2014**, *80* (14), 4242–4250. <https://doi.org/10.1128/AEM.00767-14>.
- (6) Decaro, N.; Elia, G.; Campolo, M.; Desario, C.; Mari, V.; Radogna, A.; Colaianni, M. L.; Cirone, F.; Tempesta, M.; Buonavoglia, C. Detection of Bovine Coronavirus Using a TaqMan-Based Real-Time RT-PCR Assay. *Journal of Virological Methods* **2008**, *151* (2), 167–171. <https://doi.org/10.1016/j.jviromet.2008.05.016>.
